# Supplementary material for: A Metabolic Study of Huntington’s Disease
Source: PLoS One. 2016 Jan 8;11(1):e0146480. doi: 10.1371/journal.pone.0146480 (PMC4706313; doi:10.1371/journal.pone.0146480)
Supplement: S1 Table — (XLS) [file pone.0146480.s001.xls]

## Sheet: Sheet1
Subject_nr	group	age	gender	CAG	Burden	Func_cap	Motor_assess	BMI	SFT mm	WHR	CA cm	SAT (cm^2)	VAT (cm^2)	TOTAL FAT (cm^2)	BODY AREA (cm^2)	VAT/SAT ratio (%)	SAT %
2	Control	46	Male			13	0	27	7	0.85	94
11	Control	39	Female			13	0	20.5	9.2	0.79	73.5	143	21	164	369	14.6853	44.4444
17	Control	29	Female			13	0	25.1	19	0.8	81	202	33	235	498	16.3366	47.1888
20	Control	37	Male			13	0	28.6	28	0.94	94	220	142	362	746	64.5455	48.5255
21	Control	60	Female			13	0	20.3	7	0.78	76	153	31	184	416	20.2614	44.2308
24	Control	54	Female			13	0	24.3	14	0.79	78	95			388
25	Control	52	Female			13	0	23	9	0.79	102	207	58	265	599	28.0193	44.2404
27	Control	56	Male			13	0	27.7	17	1	91	145	92	237	632	63.4483	37.5
28	Control	60	Male			13	0	29.3	28	0.97	100	88	262	350	743	297.727	47.1063
29	Control	69	Male			13	0	28.1	15	0.93	103	174	175	349	736	100.575	47.4185
31	Control	66	Male			13	0	37.2	24	1.02	127	243	282	525	1055	116.049	49.763
32	Control	57	Male			13	0	24	11	0.81	94	191	83	274	576	43.4555	47.5694
34	Control	62	Male			13	0	28.75	21	0.93	103	185	231	416	765	124.865	54.3791
39	Control	40	Male			13	0	25	15	0.85	90	94	110	204	617	117.021	33.0632
40	Control	53	Female			13	0	21	8	0.77	75	77	21	98	338	27.2727	28.9941
1	Premanifest HD	47	Male	41	259	13	7	27.45				131	175	306	717	133.588	42.6778
4	Premanifest HD	46	Female	43	345	13	2	24.19				211	54	265	531	25.5924	49.9058
5	Premanifest HD	31	Female	47	357	13	3	26.2	26	0.86	91	247	40	287	638	16.1943	44.9843
7	Premanifest HD	51	Female	44	434	13	11	23.7	23	0.85	84.5
8	Premanifest HD	46	Male	40	207	13	0	31.3	21	0.97	105	114	208	322	819	182.456	39.3162
9	Premanifest HD	53	Female	40	239	13	0	31.7	29.3	0.8	124	390	107	497	736	27.4359	67.5272
10	Premanifest HD	43	Female	42	280	13	0	29	25	0.92	100.5	289	91	380	714	31.4879	53.2213
14	Premanifest HD	58	Male	41	319	13	4	35.1	35	0.95
15	Premanifest HD	49	Male	42	319	13	0	23.3	11.5	0.96	83.4	90	20	110	447	22.2222	24.6085
23	Premanifest HD	40	Male	42	260	13	0	27.3	21	1	101
26	Premanifest HD	33	Female	42	215	13	0	26	22	0.81	99
30	Premanifest HD	43	Female	41	237	13	0	26.5	18	0.83	100	198	69	267	543	34.8485	49.1713
37	Premanifest HD	43	Female	44	366	13	0	34.2	21	0.75	109	477	66	543	789	13.8365	68.8213
42	Premanifest HD	44	Female	44	374	12	6	39	14	0.98	127	506	125	631	974	24.7036	64.7844
3	Stage II/III HD	42	Female	42	273	10	20	27.7	32	0.91	90	110	52	162	533	47.2727	30.394
6	Stage II/III HD	56	Female	42	364	9	29	28.6	29	0.94	102	293	137	430	735	46.7577	58.5034
12	Stage II/III HD	56	Female	42	364	7	45	28	23	0.87	99	310	128	438	725	41.2903	60.4138
13	Stage II/III HD	43	Male	47	495	9	39	33	18.2	0.98	102	110	195	305	746	177.273	40.8847
16	Stage II/III HD	61	Male	42	397	12	10	20	12	0.8	76	88	23	111	446	26.1364	24.8879
18	Stage II/III HD	58	Male	43	435	7	44	24.3	12	0.88	92	112	94	206	524	83.9286	39.313
19	Stage II/III HD	44	Male	47	506	7	38	23.4	11	0.97		137	117	254	548	85.4015	46.3504
22	Stage II/III HD	63	Female	42	410	9	38	26.2	17.5	0.85	110	328	125	453	743	38.1098	60.969
33	Stage II/III HD	63	Male	42	410	8	36	26	17	0.84	97	175	178	353	620	101.714	56.9355
35	Stage II/III HD	61	Male	47	702	9	56	24.5	12	0.93	96	107	58	165	532	54.2056	31.015
36	Stage II/III HD	59	Male	42	384	6	37	27.6	17	0.88	100	97	193	290	688	198.969	42.1512
41	Stage II/III HD	70	Male	42	455	5	65	24.6				213	167	380	754	78.4038	50.3979
43	Stage II/III HD	44	Female	46	462	11	33	20.5	9	0.77	74	217	61	278	469	28.1106	59.2751
