# Supplementary material for: A Metabolic Study of Huntington’s Disease
Source: PLoS One. 2016 Jan 8;11(1):e0146480. doi: 10.1371/journal.pone.0146480 (PMC4706313; doi:10.1371/journal.pone.0146480)
Supplement: S2 Table — (XLS) [file pone.0146480.s002.xls]

## Sheet: Sheet1
Subject_nr	Group	OVAL	HOMA-S	HOMA-B	Lactate	Alkaline_Phosphatase	Osteocalcin	Osteonectin	Osteoprotegerin	Sclerostin	Total_cholesterol	LDL	HDL	Triglycerides	Lipoproteins	ApoA1	ApoB	fatty_acids	Bhydroxy	Leptin_6	Leptin_13	Ghrelin_6	Ghrelin_13
2	Control	301.49	440.26	24.63	0.68	26.87	36.4	113.8	0.22	0.52	5.3	3.5	1.1	1.5	0.07	1.44	1.12	0.58		6.5	3.26	42.05	54.41
11	Control	63.58	149.68	52.5	0.95	23.54	24.4	80	0.12	0.21	5.3	3	1.8	1.1	0.02	1.88	0.71	0.65	0.18	4.87	8.26	79.68
17	Control	153.57	375.72	51.03	1.1	23.15	29.2	85.4	0.17	0.29	5.6	3.4	1.7	1.2	0.29	1.61	0.89	0.29	0.05	27.44	13.17	51.97	27.46
20	Control	191.69	173.33	48.01	1.4	33.39	27.2	34	0.14	0.24	6.3	4.3	1.2	1.8	0.07	1.26	1.19			12.24	16.3	30.67	50.84
21	Control	181.22	289.16	36.59	1.23	45.77	107.4	165.8	0.23	0.23	5.2	3.3	1.4	1.1	0.3	1.16	0.66	0.09	0.05	7.96	7.61	132.37	201.46
24	Control	332.81	366.46	59.26	0.8	42.07	86.6	90.8	0.21	0.18	5.3	3.3	1.7	0.7	0.15	1.37	0.85	0.59	0.13	14.22	16.8	39.07	108.74
25	Control	95.49	247.83	48.77	1.09	42.86	46	365.4	0.21	0.03	5.6	3.4	1.8	0.8	0.3	1.68	0.84	0.34	0.05	10.63	14.83	79.92	251.73
27	Control	301.38	349.94	39.73	1.14	33.29	55.6	65.4	0.21	0.45	4.7	2.6	1.7	0.9	0.16	1.57	0.69	0.39	0.05	5.8	4.89	66.85	58.63
28	Control	383.56	183.75	43.4	1.55	35.41	25.8	80	0.26	0.27	4	2.4	0.8	1.8	0.14	1.11	0.88	0.62	0.14	10.2	12.2	124.94	62.41
29	Control	526.93	367.06	51.24	1.34	29.82	29.2	127.2	0.22	0.36	3.6	2.2	0.8	1.3	0.09	1.03	0.64	0.54	0.1	9.91	8.65	57.9	47.37
31	Control	493.9	112.9	30.24	1.11	30.48	38.8	414.6	0.26	0.16	3	1.5	0.7	1.8	0.06	1.1	0.57	0.51	0.14	19.67	25.02	109.46	40.35
32	Control	681.3	501.94	19.13		28.24	30.6	212.2	0.21	0.27	5	2.8	1.9	0.7	0.06	1.36	0.66	0.6	0.2	6.1	7.42	57.19	43.55
34	Control	160.68	54.66	70.4	1.51	39.42	36.6	121.6	0.16	0.21	3.3	1.5	1.6	0.5	0.02	1.19	0.45	0.17	0.05	20.91	28.09	50.04	59
39	Control	529.29	294.11	46.11		28.48	36.2	298.2	0.16	0.18	3.7	1.9	1.4	0.9	0.27	1.53	0.83	0.52	0.2	5.92	8.7	45.26	60.07
40	Control	372.63	325.32	56.9	1.3	15.52	29.6	123.4	0.16	0.2	4.4	1.8	2.3	0.6	0.48	1.65	0.6	0.88	0.37	4.38	7.11	83.44	54.59
3	Moderate HD	620.48	452.75	23.15	0.94	55.03	39	130.4	0.23	0.4	3.3	2.2	0.9	0.5	0.63	1.21	0.8	0.69	0.08	52.02	42.24	75.76	36.5
6	Moderate HD	912.37	578.54	39.21	2.24	47.06	52.8	163.6	0.24	0.29	3.3	2	0.8	1.1	0.15	1.25	0.85	0.45	0.05	24.76	21.17	68.7	58.91
12	Moderate HD	371.99	227.06	47.49	0.83	42.91	26.8	100	0.19	0.23	5.2	3.2	1.2	1.8	0.02	1.38	0.98	0.56	0.18	22.54	22.11	62.72	84.13
13	Moderate HD	266.87	358.52	61.75	0.8	34.05	56.2	202.2	0.15	0.29	6.1	4.4	0.8	2	0.16	1.12	1.12	0.68	0.11	5.26	6.37	47.41	74.26
16	Moderate HD	426.28	283.07	27.09	1.1	27.92	71.6	86	0.19	0.33	5.8	3.7	1.7	1	0.02	1.51	0.97	0.73	0.23	2.22	3.15	66.67	131.18
18	Moderate HD	679.93	386.24	51.53		27.05	32	150	0.18	0.24	6.3	4.3	1.6	1	0.02	1.59	1.15	0.19	0.05	5.2	4.83	47.85	47.63
19	Moderate HD	391.08	285.43	49.05	1.25	28.85	40.4	79.4	0.19	0.44	5.4	3.7	1.3	0.9	0.13	1.25	0.86			5.48	5.09	58.85	46.4
22	Moderate HD	455.69	542.76	32.49	0.78	49.76	39	1340.2	0.28	0.03	4.5	1.7	2.4	0.9	0.05	1.96	0.56	0.47	0.1	27.57	26.52	57.46	70.77
33	Moderate HD	258.3	149.97	70.17	1.32	38.43	39.6	122.2	0.18	0.28	2.9	1.6	0.9	1	0.59	1.04	0.72	0.27	0.05	17.78	15	32.76	30.87
35	Moderate HD	416.45	460.9	39.73	1.16	42.41	34.4	103.4	0.26	0.33	3.7	1.4	2	0.7	0.1	1.48	0.43	0.28	0.05	3.81	3.37	32.19	32.47
36	Moderate HD	334.07	419.16	36.4	0.88	46.81	39.8	189	0.21	0.23	4	2.4	1.4	0.4	0.04	1.08	0.55	0.49	0.11	7.82	7.07	36.42	48.68
41	Moderate HD	514.75	545.24	39.28	1.45	19.85	22.4	91.2	0.19	0.11	3.8	2.2	1	1.4	0.23	1.25	0.77	0.19	0.05	9.32	8.48	122.66	64.73
43	Moderate HD	81.92	230.41	46.2	1.26	26.58	24.4	61	0.19	0.23	5.1	3.2	1.6	0.6	0.41	1.43	0.87	0.27	0.05	27.21	13.46	73.57	68.71
1	Premanifest HD	146.68	365.8	27.83	1.15	38.3	21.8	111.6	0.21	0.4	5.1	2.7	1.7	1.5	0.72	1.85	1.06	0.36	0.05	6.26	7.52	173.69	133.87
4	Premanifest HD	253.71	368.62	28.95	1.12	40.2	22.2	118	0.26	0.41	5	3.3	1.2	1.1	0.3	1.39	0.97	0.2	1e-06	40.46	42.37	50.01	45.64
5	Premanifest HD	206.13	187.57	96.65	1.48	42.72	37.6	157.4	0.22	0.36	3.6	2.1	1.1	1	0.47	1.22	0.68	0.37	0.05	24.37	20.2	72.71	85.93
7	Premanifest HD	439.11	518.92	36.74	0.86	40.52	61.6	161.8	0.24	0.36	5.6	3.1	2.1	0.8	0.04	1.92	0.81	0.72	0.1	12.04	9.74	81.43	52.28
8	Premanifest HD	230.85	275.1	40.61	1.6	69.15	26.4	81.8	0.24	0.3	4.8	2.9	1	1.9	0.05	1.15	0.95	0.48	0.16	4.46	5.17	56.75	49.14
9	Premanifest HD	166.64	282.75	65.8	0.81	39.71	26	78	0.2	0.36	5.9	4.1	1.2	1.3	0.82	1.32	1.17	0.58		116.22	72.91	90.47	49.28
10	Premanifest HD	538.35	273.73	81.48	1.63	31.07	13.4	113.4	0.22	0.21	2.5	1.7	1.4	0.9	0.83	2.04	0.84	0.29	0.05	33.85	30.04	55.95	59.68
14	Premanifest HD	451.7	236.24	39.77	1.52	27.98	27.2	173.2	0.21	0.24	6.6	4.7	1	2.1	0.33	1.26	1.28	0.63	0.13	22.5	26.54	114.08	41.76
15	Premanifest HD	574.26	383.43	44.5	1.28	28.87	31.4	216	0.32	0.37	5.3	3.3	1.2	1.7	0.11	1.53	0.9	0.39	0.05	2.39	2	126.4	65.98
23	Premanifest HD	377.61	208.52	46.72	1.7	24	28.8	811.6	0.15	0.02	5	3.4	1.2	0.9	0.43	1.35	0.99	0.36	0.05	6.74	7	82.69	109.06
26	Premanifest HD	201.27	318.31	52.86	1.09	41.07	28	238	0.17	0.25	4.8	2.5	1.9	1	0.23	1.47	0.67	0.5	0.05	52.54	49.2	166.45	41.74
30	Premanifest HD	257.35	330.13	25.3	1.32	35.81	44.2	776.8	0.22	0.07	3.9	2.2	1.3	0.9	0.1	1.25	0.53	0.17	0.05	33	34.89	59.57	43.12
37	Premanifest HD	353.13	323.13	60.17		24.11	24	193.4	0.17	0.15	4.2	3.3	0.7	0.4	0.02	1.11	0.69	0.32	0.06	40.96	47.31	52.29	39.97
42	Premanifest HD	241.59	152.31	75.74	1.36	22.23	31.2	459.4	0.22	0.32	4.2	2.9	0.9	1	0.23	1.09	0.95	0.34	0.05	47.27	36.34	48.29	59.01
