# Supplementary material for: A Metabolic Study of Huntington’s Disease
Source: PLoS One. 2016 Jan 8;11(1):e0146480. doi: 10.1371/journal.pone.0146480 (PMC4706313; doi:10.1371/journal.pone.0146480)
Supplement: S3 Table — (XLS) [file pone.0146480.s003.xls]

## Sheet: Sheet1
Subject_nr	Group	Taurine_Par	Aspartate_Par	Threonine_Par	Serine_Par	Asparagine_Par	GlutamicAcid_Par	Glutamine_Par	Proline_Par	Glycine_Par	Alanine_Par	AminobutyricAcid_Par	Citrulline_Par	Valine_Par	Cysteine_Par	Methionine_Par	Isoleucine_Par	Leucine_Par	Tyrosine_Par	Phenylalanine_Par	Ornithine_Par	Histidine_Par	Lysine_Par	Arginine_Par
2	Control	86	2	96	79	51	18	639	257	304	326	21	66	204	79	22	61	121	53	58	54	72	140	93
11	Control	85	3	151	101	64	28	403	112	134	185	27	37	232	98	19	66	120	40	51	36	74	133	54
17	Control	94	4	151	130	62	29	565	186	259	462	23	48	207	114	25	58	102	72	48	57	86	185	103
20	Control	92	14	110	117	59	74	489	214	175	440	26	21	295	86	21	85	153	61	63	73	60	148	61
21	Control
24	Control	97	2	118	140	60	31	638	164	277	281	22	39	221	81	21	60	98	55	43	64	71	157	81
25	Control	185	6	114	149	64	39	697	196	572	419	21	58	174	91	19	53	94	46	49	61	67	141	74
27	Control
28	Control	178	5	143	104	51	82	617	227	185	387	26	43	284	96	28	91	158	81	69	64	69	179	85
29	Control	159	6	180	164	77	70	744	276	296	506	45	52	311	102	30	94	158	76	67	75	96	230	89
31	Control	214	5	147	99	52	118	630	175	177	339	37	55	348	128	26	127	185	96	66	70	75	210	97
32	Control	175	5	221	160	84	56	706	280	365	297	51	49	298	177	26	91	164	63	47	92	81	223	93
34	Control	166	8	142	135	79	75	706	222	243	749	42	26	248	147	30	66	111	69	71	63	93	176	91
39	Control	117	5	164	146	51	82	608	218	238	213	37	55	297	110	25	78	153	55	49	54	79	215	110
40	Control
3	Moderate HD	108	4	71	113	53	20	597	171	181	380	18	25	209	59	18	55	108	62	58	30	76	204	57
6	Moderate HD	83	4	115	97	50	75	563	124	270	546	26	26	190	76	20	48	99	69	49	47	81	148	101
12	Moderate HD	127	5	97	124	44	77	516	112	167	353	28	54	204	135	18	57	108	62	59	78	73	188	85
13	Moderate HD	205	6	142	124	60	68	696	198	233	324	32	70	293	126	30	98	179	71	70	70	90	212	112
16	Moderate HD	136	5	142	141	62	32	624	135	288	275	35	43	271	103	23	64	146	58	48	66	69	174	80
18	Moderate HD	93	3	116	102	53	27	610	159	198	511	37	50	298	125	24	83	151	74	79	61	78	194	95
19	Moderate HD	134	7	136	107	61	33	606	183	218	368	21	49	229	100	26	79	139	73	54	67	77	133	100
22	Moderate HD
33	Moderate HD	153	7	194	139	67	63	707	323	290	594	44	58	350	126	33	110	191	93	71	109	90	250	105
35	Moderate HD	186	5	186	141	79	59	664	206	326	371	28	59	302	149	28	79	158	74	79	98	76	218	105
36	Moderate HD	176	6	138	117	73	48	721	207	190	353	43	54	247	104	26	68	123	73	56	65	81	176	86
41	Moderate HD	171	8	168	124	52	105	706	295	330	510	23	88	287	127	27	85	152	71	67	108	95	211	144
43	Moderate HD	126	7	194	193	60	46	527	188	616	473	28	56	248	58	30	72	122	65	58	59	101	188	107
1	Premanifest HD	96	4	148	89	51	50	570	163	162	429	35	31	250	83	25	64	137	78	59	53	81	178	95
4	Premanifest HD	90	3	99	110	47	39	561	118	231	284	22	43	233	86	17	54	111	66	59	43	68	140	72
5	Premanifest HD	101	5	123	143	63	42	580	195	250	689	31	22	255	70	29	60	127	80	63	41	82	179	84
7	Premanifest HD	157	6	148	166	59	42	579	113	533	261	34	68	213	69	25	63	119	63	53	76	63	119	96
8	Premanifest HD	167	4	137	103	53	96	632	233	243	602	26	64	429	117	29	110	221	84	64	68	84	198	103
9	Premanifest HD	169	5	134	112	47	66	604	221	332	548	29	39	290	96	22	73	133	71	64	55	81	184	77
10	Premanifest HD	124	5	141	95	62	34	462	117	127	504	33	38	243	106	22	65	121	51	60	27	78	209	67
14	Premanifest HD
15	Premanifest HD	79	2	211	150	93	22	738	299	263	481	30	60	313	127	35	97	176	84	76	91	89	242	128
23	Premanifest HD	92	5	131	126	87	55	689	267	268	469	33	73	250	120	25	67	132	66	56	68	72	174	117
26	Premanifest HD
30	Premanifest HD	206	16	146	154	99	48	517	154	492	452	19	52	258	90	25	69	120	65	61	50	85	228	84
37	Premanifest HD
42	Premanifest HD	126	8	196	158	44	66	448	208	207	389	24	29	325	89	27	95	151	88	62	87	81	220	101
