# Supplementary material for: A Metabolic Study of Huntington’s Disease
Source: PLoS One. 2016 Jan 8;11(1):e0146480. doi: 10.1371/journal.pone.0146480 (PMC4706313; doi:10.1371/journal.pone.0146480)
Supplement: S4 Table — (XLS) [file pone.0146480.s004.xls]

## Sheet: Sheet1
Subject_nr	Group	Taurine_Lon	Aspartate_Lon	Threonine_Lon	Serine_Lon	Asparagine_Lon	GlutamicAcid_Lon	Glutamine_Lon	Proline_Lon	Glycine_Lon	Alanine_Lon	Valine_Lon	Methionine_Lon	Isoleucine_Lon	Leucine_Lon	Tyrosine_Lon	Phenylalanine_Lon	Ornithine_Lon	Histidine_Lon	Lysine_Lon	Arginine_Lon	Tryptophan_Lon
2	Control	47	2	201	88	55	42	757	229	279	292	209	22	58	132	51	59	60	81	180	95	51
11	Control	28	8	141	91	50	37	406	101	121	168	214	17	58	114	35	46	32	79	129	55	65
17	Control	46	4	129	120	47	80	572	159	224	371	188	24	54	95	64	50	47	81	175	105	70
20	Control
21	Control	109	9	89	96	52	88	497	110	217	407	159	18	49	91	42	46	39	74	170	80	51
24	Control	55	3	102	134	43	58	589	116	245	210	182	18	45	87	42	35	49	65	151	80	32
25	Control	68	3	121	162	60	63	809	192	598	416	184	20	56	102	41	55	60	93	175	86	48
27	Control	42	2	112	118	62	82	690	155	244	390	217	24	65	127	62	55	57	82	174	97	56
28	Control	54	2	128	95	42	98	573	188	155	305	249	26	77	147	72	64	49	83	174	82	60
29	Control	85	4	200	180	78	135	890	278	306	528	340	48	110	189	87	77	79	135	305	114	83
31	Control	105	6	140	96	44	358	382	141	155	279	314	24	113	177	86	67	60	75	218	98	65
32	Control	94	3	193	133	64	68	711	232	297	245	254	29	75	145	47	47	74	77	203	82	52
34	Control	74	4	132	118	62	70	673	182	194	564	216	28	58	101	56	66	50	88	166	81	53
39	Control	112	4	145	128	48	97	641	189	188	195	274	24	71	142	49	48	48	78	199	96	50
40	Control	65	2	118	103	91	27	519	92	230	204	237	20	66	137	49	51	31	77	167	71	41
3	Moderate HD
6	Moderate HD	47	3	114	95	52	102	633	118	253	483	184	19	47	99	65	50	46	96	173	106	50
12	Moderate HD	52	6	96	124	40	86	553	104	162	350	185	19	49	95	61	58	62	80	199	105	55
13	Moderate HD	54	4	140	119	50	108	704	162	209	295	265	28	84	170	64	66	60	93	209	111	66
16	Moderate HD	54	3	137	136	53	163	582	121	268	238	251	23	59	139	53	49	52	86	181	83	58
18	Moderate HD	57	2	97	81	38	37	575	123	160	396	244	23	66	131	58	70	44	69	167	83	53
19	Moderate HD	69	3	139	104	54	53	725	175	210	353	237	28	75	144	71	61	50	105	138	106	56
22	Moderate HD	54	2	170	140	49	59	657	115	298	245	261	21	66	132	58	51	82	79	237	105	52
33	Moderate HD	94	5	169	123	53	80	691	263	241	498	309	32	94	173	81	70	83	87	249	105	63
35	Moderate HD	64	2	156	114	57	55	592	154	262	304	238	25	59	138	56	66	74	74	198	92	29
36	Moderate HD	93	4	123	103	58	66	720	161	160	271	222	26	62	124	64	55	52	92	176	83	52
41	Moderate HD	92	3	125	95	44	107	620	201	227	339	212	21	60	113	49	51	79	75	155	101	49
43	Moderate HD	50	3	150	146	52	33	510	152	474	400	198	23	54	92	47	48	45	81	159	82	49
1	Premanifest HD	66	3	7	112	63	84	727	196	184	425	266	34	74	175	89	79	54	122	260	165	76
4	Premanifest HD	84	4	105	114	52	84	591	119	230	290	213	21	52	117	61	64	38	87	184	109	71
5	Premanifest HD	71	11	110	124	50	89	509	145	200	480	211	25	54	113	70	58	35	91	187	93	62
7	Premanifest HD	108	8	157	191	64	299	441	127	519	262	219	30	63	139	61	63	75	87	170	157	53
8	Premanifest HD	71	2	117	88	51	117	551	173	190	402	342	24	93	189	68	56	57	92	209	97	69
9	Premanifest HD	91	3	115	93	45	81	594	172	263	364	245	21	63	124	58	56	48	89	195	73	58
10	Premanifest HD	73	6	129	88	50	54	471	106	117	406	213	24	60	116	46	62	25	87	207	74	59
14	Premanifest HD	47	4	107	116	45	108	557	160	162	365	234	22	60	146	56	57	51	86	205	84	52
15	Premanifest HD	40	2	176	129	68	36	719	234	212	394	266	33	83	154	69	71	69	88	222	122	77
23	Premanifest HD	62	3	111	108	65	63	632	213	220	373	219	24	59	121	53	52	52	83	164	101	49
26	Premanifest HD	121	10	127	127	58	106	634	173	249	440	226	30	67	131	73	65	51	94	214	116	56
30	Premanifest HD	76	6	125	122	70	68	489	119	415	373	208	21	57	103	50	57	33	94	229	82	56
37	Premanifest HD	93	6	153	202	85	92	616	189	304	394	204	32	63	110	53	58	73	87	261	124	47
42	Premanifest HD	95	5	184	146	43	66	533	176	177	390	312	26	86	142	80	61	79	81	224	98	65
